# Supplementary material for: Impact of COVID-19 on pediatric asthma-related healthcare utilization in New York City: a community-based study
Source: Springer Nature journal article supplement (doi:10.1186/s12887-023-03845-1), 2023-01-23
Supplement: MOESM1 [file 23946264]

## Asthma/Covid-19 survey

AAA  


We are going to ask you a series of questions regarding your experiences during the COVID-19 pandemic. We will be asking questions related to your child's asthma care during this period, as well as factors that may have affected your entire family. You can refuse to answer any question you don't feel comfortable answering. We would like to talk to someone in your household who can answer health questions about your child with asthma. Would you be able to answer these questions? [Interviewer Note: if not, please identify the best person to answer the survey questions and proceed with survey with identified person]

Real

Test

↻

### Phone Consent for Impact of COVID-19 on Children with Asthma Study

Hello, my name is \_\_\_\_\_, calling on behalf of Dr. \_\_\_\_\_ office at Mount Sinai \_\_\_\_\_.

We are calling to see if you are willing to help us with a research study. The purpose of this research study is to see how the SARS-CoV-2 outbreak has impacted your child's asthma and is affecting you and your family. You are being asked to take part in a research study if you have a child who is 5-17 years old, with asthma and one of the following: daily controller asthma medication use, recent rescue inhaler use or at least 1 ED/urgent care visit or hospital admission for asthma in the last year. Do you have a few minutes to talk?

If No.

If they don't have time to talk: Would you like me to call you back? When is a good time?

OR

If they do not want to participate: Thank you for your time, I hope you and your family are staying safe! You can always call your doctor's office if you have any questions about your health during this time.

If Yes.

Being in a research study is completely voluntary. You can choose not to be in this research study. You can also say yes now, and change your mind later. Deciding not to be in the research study, now or later, will not affect your ability to receive medical care at Mount Sinai Medical Center.

If you agree to take part in this research, you will be asked to complete the phone survey. Your participation in this study will take about 30-minutes and we will offer a \$40 gift card for your time. We expect that 50 people will take part in this research study.

You can choose not to answer any question you do not wish to answer. You can also choose to stop taking the survey at any time. You must be at least 18 years old to participate. If you are younger than 18 years old, you will not be able to answer the survey.

The possible risks to you in taking part in this research are:

Potential loss of confidentiality of data

The possible benefits to you for taking part in this research are:

Our community having a better understanding of the impact the outbreak has had on non-COVID-19 medical care

\$40 gift card

To protect your identity as a research subject, no identifiable information will be collected, the research data will not be stored with your name, and the researcher(s) will not share your information with anyone. In any publication about this research, your name or other private information will not be used.

If you have any questions about this research, please contact the researcher at [nicholas.defelice@mssm.edu](mailto:nicholas.defelice@mssm.edu) or [erin.thanik@mssm.edu](mailto:erin.thanik@mssm.edu). You can also call the Program for the Protection of Human Subjects Office at 212-824-8200.

If Yes.

Thank you for consenting to participate with our survey. You may refuse to answer any questions and can stop

the survey at any time. Your participation will help us better understand the challenges families faced during the pandemic. We appreciate your time.

Continue to survey.

Do you consent to this survey?

Yes

No

↻

Completion Date

 Today

FECHA DE FINALIZACIÓN:

\* must provide value

INTERVIEWER's INITIALS

INICIALES DEL ENTREVISTADOR:

\* must provide value

Language

English

IDIOMA:

Spanish

Español

↻

We are going to ask you a series of questions regarding your experiences during the COVID-19 pandemic. We will be asking questions related to your child's asthma care during this period, as well as factors that may have affected your entire family. You can refuse to answer any question you don't feel comfortable answering. We would like to talk to someone in your household who can answer health questions about your child with asthma. Would you be able to answer these questions? [Interviewer Note: if not, please identify the best person to answer the survey questions and proceed with survey with identified person]

Vamos a hacerle una serie de preguntas con respecto a sus experiencias durante la pandemia COVID-19. Haremos preguntas relacionadas con el cuidado del asma de su hijo/a durante este período, así como los factores que pueden haber afectado a toda su familia. Puedes negarte a responder a cualquier pregunta que no te sientas cómodo respondiendo. Nos gustaría hablar con alguien en su hogar que pueda responder preguntas de salud sobre su hijo/a con asma. ¿Sería capaz de responder a estas preguntas? [Nota del entrevistador: si no, por favor identifique a la mejor persona para responder a las preguntas de la encuesta y proceder con la encuesta con la persona identificada]

SECTION A: ASTHMA SCREENING QUESTIONS

10021

1.What is the zip code of your home in New York City?

10035

10028

SECCIÓN A: PREGUNTAS DE DETECCIÓN DEL ASMA

10029

1.¿Cuál es el código postal de su casa en la ciudad de Nueva York?

10129

10075

10065

10162

If other Zipcode then not eligible for

study

Si es otro código postal, entonces no es elegible para estudiar

 10128

(Interviewer Note: Inclusion criteria: zip codes 10029, 10035, 10028, 10128, 10021,10075,10065,10162)

**I'd like to ask questions about your children with asthma.****Me gustaría hacer preguntas sobre sus hijo/a con asma.****2.How many of your children who live in your home do you think has asthma?****2.¿Cuántos de sus hijos/as que viven en su hogar cree que tienen asma?****What are their first name/names?****Cuáles son sus nombres?**

Expand

**How old are they (in years)?****Cuántos años tienen?**

**[Interviewer Note: List all children with asthma, and first ask questions about the child who was identified for this survey. If there wasn't a child identified for the survey or if the identified child does not meet inclusion criteria, ask survey questions 3-8, starting with the oldest child with asthma and continue with subsequent younger children until you identify a child who meets inclusion criteria]**

**[Nota del entrevistador: Enumere a todos los niños con asma y primero haga preguntas sobre el niño que fue identificado para esta encuesta. Si no se identificó a un niño para la encuesta o si el niño identificado no cumple con los criterios de inclusión, haga preguntas de la encuesta 3-8, comenzando con el niño mayor con asma y continúe con los niños más pequeños subsiguientes hasta que identifique a un niño que cumpla con los criterios de inclusión]**

**I'd first like to ask some health questions about {identified child with asthma}****3. What is your relationship to {child with asthma}?****En primer lugar, me gustaría hacer algunas preguntas de salud sobre el niño identificado con asma****Cuál es tu relación con el niño con asma?**

- Mother (mark step if applicable)  
Madre (marque el paso si corresponde)
- Father (mark step is applicable)  
Padre (se aplica el paso de marca)
- Brother/Sister (mark step/half if applicable)  
Hermano/Hermana (marque el paso/mitad si corresponde)
- Grandparent (mark father/mother)  
Abuelo (marca padre/madre)
- Other Relative

- Otro pariente
- Unrelated
- No relacionado
- Don't Know
- No sé
- Refused to answer
- Se nego a responder



**[Interviewer Note: Parent/guardian needs to answer affirmatively to question 4 and at least one question between 5-8 to be eligible and to identify active asthma]**

**[Nota del entrevistador: El padre/guardián debe responder afirmativamente a la pregunta 4 y al menos una pregunta entre 5-8 para ser elegible e identificar el asma activo]**

**4. Has a doctor, nurse or other health professional ever said that {the child} has asthma?**

**Alguna vez un médico, enfermera u otro profesional de la salud ha dicho que el niño tiene asma?**

- Yes,  
Si
- No [If no, explain that patient is not eligible, ask questions 3-8 for next oldest child with reported asthma],  
- No [Si no, explique que el paciente no es elegible, haga preguntas 3-8 para el próximo niño mayor con asma reportada]
- Refused to answer  
Se negó a responder



**5. In the past 3 months, what prescription asthma medications did {child with asthma} take by inhaler? [Interviewer Note: See drop down menu including meds and check all that apply, affirmative if at least one medication from list is identified excluding quick relief medications (ventolin, albuterol or proventil)]**

**En los últimos 3 meses, ¿qué medicamentos recetados para el asma tomo su hijo/a con asma por inhalador? [Nota del entrevistador: Ver menú desplegable incluyendo medicamentos y comprobar todos los que se aplican, afirmativo si al menos un medicamento de la lista se identifica excluyendo los medicamentos de alivio rápido (ventolin, albuterol o proventil)]**

- Advair (+ A. Diskus)
- Aerobid
- Albuterol ( + A. sulfate or salbutamol)
- Alupent
- Asmanex (twisthaler)
- Atrovent
- Azmacort
- Beclomethasone dipropionate
- Beclovent
- Bitolterol
- Brethaire
- Budesonide
- Combivent
- Cromolyn
- Flovent
- Flovent Rotadisk
- Flunisolide
- Fluticasone
- Foradil
- Formoterol

- Intal
- Ipratropium Bromide
- Levalbuterol tartrate
- Maxair
- Metaproteronol
- Mometasone furoate
- Nedocromil
- Pirbuterol
- Pro-Air HFA
- Proventil
- Pulmicort Turbuhaler
- QVAR
- Salbutamol (or Albuterol)
- Salmeterol
- Serevent
- Singulair
- Symbicort
- Terbutaline (+ T. sulfate)
- Tilade
- Tonalate
- Triamcinolone acetonide
- Vanceril
- Ventolin
- Xopenex HFA
- Other, Please Specify
- no prescription inhalor
- do not know
- refused

**Comments/Notes**

**Comentarios / Notas**

Expand

**6. During the past 3 months, has {child's name} used the kind of PRESCRIPTION asthma inhaler that gives QUICK relief from asthma symptoms during an attack?[Interviewer Note - this includes medications such as ventolin, albuterol, proventil, or inhaler containing a long acting beta agonist]**

**Durante los últimos 3 meses, ¿ha utilizado {el nombre del niño} el tipo de inhalador de asma RECETADO que proporciona alivio rápido de los síntomas del asma**

- Yes  
Sí
- No  
No
- Don't Know  
No sé
- Refused to answer

|                                                                                                                                                                                                                                                                                                                                                                                                                                                                                                                                                                                                                                                                                                                                                                                                                                                                                                                                                                                                                                                                                                                                                                                                                                                                                         |                                                                                                                                                                                                                                                                                                    |
|-----------------------------------------------------------------------------------------------------------------------------------------------------------------------------------------------------------------------------------------------------------------------------------------------------------------------------------------------------------------------------------------------------------------------------------------------------------------------------------------------------------------------------------------------------------------------------------------------------------------------------------------------------------------------------------------------------------------------------------------------------------------------------------------------------------------------------------------------------------------------------------------------------------------------------------------------------------------------------------------------------------------------------------------------------------------------------------------------------------------------------------------------------------------------------------------------------------------------------------------------------------------------------------------|----------------------------------------------------------------------------------------------------------------------------------------------------------------------------------------------------------------------------------------------------------------------------------------------------|
| <p><b>durante un ataque? [Nota del entrevistador - esto incluye medicamentos como ventolin, albuterol o proventil or inhaler containing a long acting beta agonist]</b></p>                                                                                                                                                                                                                                                                                                                                                                                                                                                                                                                                                                                                                                                                                                                                                                                                                                                                                                                                                                                                                                                                                                             | <p>Se negó a responder</p>                                                                                                                                                                                                                                                                         |
| <p><b>Now I am going to ask about {your child's} asthma over the past year:</b></p> <p><b>Ahora voy a preguntar sobre el asma de su hijo/a durante el año pasado:</b></p>                                                                                                                                                                                                                                                                                                                                                                                                                                                                                                                                                                                                                                                                                                                                                                                                                                                                                                                                                                                                                                                                                                               |                                                                                                                                                                                                                                                                                                    |
| <p><b>7. During the past 12 months, how many times did {he/she/they} visit an emergency room or urgent care center because of {his/her/their} asthma?</b></p> <p><b>Durante los últimos 12 meses, ¿cuántas veces su niño/a visitó una sala de emergencias o un centro de atención de urgencia debido al asma?</b></p>                                                                                                                                                                                                                                                                                                                                                                                                                                                                                                                                                                                                                                                                                                                                                                                                                                                                                                                                                                   | <p><input type="radio"/> Times (affirmative if answers one or more times)<br/>Veces (afirmativa si responde 1 o más veces]</p> <p><input type="radio"/> Zero<br/>Cero</p> <p><input type="radio"/> Don't Know<br/>No se</p> <p><input type="radio"/> Refused to answer<br/>Se negó a responder</p> |
| <p><b>Comments/ Notes</b></p>                                                                                                                                                                                                                                                                                                                                                                                                                                                                                                                                                                                                                                                                                                                                                                                                                                                                                                                                                                                                                                                                                                                                                                                                                                                           | <div style="border: 1px solid black; height: 80px; width: 100%;"></div> <p style="text-align: right;">Expand</p>                                                                                                                                                                                   |
| <p><b>8 8. During the past 12 months, how many different times did {he/she/they} stay in any hospital overnight or longer because of {his/her/their} asthma?</b></p>                                                                                                                                                                                                                                                                                                                                                                                                                                                                                                                                                                                                                                                                                                                                                                                                                                                                                                                                                                                                                                                                                                                    | <p><input type="radio"/> ___Times (affirmative if answers 1 or more times)</p> <p><input type="radio"/> Zero</p> <p><input type="radio"/> Don't Know</p> <p><input type="radio"/> Refused to answer</p>                                                                                            |
| <p><b>[Interviewer Note - if answered affirmative to question 4 and at least one of questions 5-8, continue survey. If they did not answer affirmatively to any of questions 3-8, state: I'm sorry, {child with asthma} is not eligible for the survey. Thank you for taking the time to answer our questions." End phone visit or ask questions 3-8 for other children in the home with asthma, if applicable. State: "I'd like to ask questions about your next oldest child with asthma" and then repeat questions 3-8 until you identify a child with asthma who fits criteria for the study]</b></p> <p><b>[Nota del entrevistador - si se responde afirmativamente a la pregunta 4 y al menos una de las preguntas 5-8, continúe la encuesta. Si no respondieron afirmativamente a cualquiera de las preguntas 3-8, Responda: Lo siento, el niño con asma no es elegible para la encuesta. Gracias por tomar el momento de responder a nuestras preguntas. Fin de la visita telefónica o haga preguntas 3-8 para otros niños en el hogar con asma, si corresponde. Estado: "Me gustaría hacer preguntas sobre su próximo hijo/a mayor con asma" y luego repetir las preguntas 3-8 hasta que identifique a un niño con asma que se ajuste a los criterios para el estudio]</b></p> |                                                                                                                                                                                                                                                                                                    |

|                                                                                                                                                                                                                                                                                                                                                                                                                                                                                                                       |                                                                                                                                                                                                                                  |
|-----------------------------------------------------------------------------------------------------------------------------------------------------------------------------------------------------------------------------------------------------------------------------------------------------------------------------------------------------------------------------------------------------------------------------------------------------------------------------------------------------------------------|----------------------------------------------------------------------------------------------------------------------------------------------------------------------------------------------------------------------------------|
| <p><b>Does the child qualify for the survey?</b></p>                                                                                                                                                                                                                                                                                                                                                                                                                                                                  | <p><input type="radio"/> Yes</p> <p><input type="radio"/> No</p>                                                                                                                                                                 |
| <p><b>SECTION B: ASTHMA CARE DURING PANDEMIC</b></p>                                                                                                                                                                                                                                                                                                                                                                                                                                                                  |                                                                                                                                                                                                                                  |
| <p>Now I'm going to ask similar health questions regarding the recent time during the pandemic. The following questions are about medical care for your child's asthma for the 6 months following the first reported case of COVID in New York City (that is, from March 1st until August 31st):</p>                                                                                                                                                                                                                  |                                                                                                                                                                                                                                  |
| <p><b>SECCIÓN B: CUIDADO DEL ASMA DURANTE LA PANDEMIA</b></p>                                                                                                                                                                                                                                                                                                                                                                                                                                                         |                                                                                                                                                                                                                                  |
| <p>Ahora voy a hacer preguntas de salud similares con respecto al tiempo reciente durante la pandemia. Las siguientes preguntas son acerca de la atención médica para el asma de su hijo/a durante los 6 meses siguientes al primer caso reportado de COVID en la ciudad de Nueva York (es decir, desde el 1 de marzo hasta el 31 de agosto):</p>                                                                                                                                                                     |                                                                                                                                                                                                                                  |
| <p><b>9. During this time period, that is from March 1st until August 31st, did {your child with asthma} have to stay overnight in the hospital because of asthma?</b></p> <p><b>Durante este período de tiempo, es decir, desde el 1 de marzo hasta el 31 de agosto, ¿tuvo que pasar la noche en el hospital debido al asma?</b></p> <p><b>[Interviewer note: this question to capture hospital admissions, not just staying the the ER overnight. There is a separate question for ER visits.]</b></p>              | <p><input type="radio"/> Yes<br/>Sí</p> <p><input type="radio"/> No<br/>No</p> <p><input type="radio"/> Don't Know/Not Sure<br/>No sé/No estoy seguro</p> <p><input type="radio"/> Refused to answer<br/>Se negó a responder</p> |
| <p><b>10. Not counting hospitalizations, during this same time period, did {your child with asthma}, go to an emergency room because of asthma?</b></p> <p><b>Sin contar las hospitalizaciones, durante este mismo período de tiempo, ¿su hijo/a con asma, fue a una sala de emergencias debido al asma?</b></p>                                                                                                                                                                                                      | <p><input type="radio"/> Yes<br/>Sí</p> <p><input type="radio"/> No<br/>No</p> <p><input type="radio"/> Don't Know/Not Sure<br/>No sé/No estoy seguro</p> <p><input type="radio"/> Refused to answer<br/>Se negó a responder</p> |
| <p><b>11. Not counting hospitalizations or emergency room visits, during this time period, did {your child with asthma} see a doctor or health care provider in the office or clinic either in-person or via Telehealth for asthma?</b></p> <p><b>Sin contar las hospitalizaciones o las visitas a la sala de emergencias, durante este período de tiempo, ¿su hijo/a con asma vio a un médico o proveedor de atención médica en el consultorio o la clínica, ya sea en persona o por telesalud para el asma?</b></p> | <p><input type="radio"/> Yes<br/>Sí</p> <p><input type="radio"/> No<br/>No</p> <p><input type="radio"/> Don't Know<br/>No sé</p> <p><input type="radio"/> Refused to answer<br/>Se negó a responder</p>                          |
| <p><b>11.2 How many were for a "wheezy episode"?</b></p>                                                                                                                                                                                                                                                                                                                                                                                                                                                              | <input type="text"/>                                                                                                                                                                                                             |

**Cuántos fueron para un "episodio de sibilancias en pecho"?**

**12. During this time period, on how many separate occasions did {your child with asthma} have to take steroid medicine pills or liquid medications for several days because their asthma got worse?**

**Durante este período de tiempo, ¿en cuántas ocasiones separadas tuvo que tomar píldoras de medicamentos esteroides durante varios días porque su asma empeoró?**

- Yes  
Sí
- No  
No
- Don't Know/Not Sure  
No sé/No estoy seguro
- Refused to answer  
Se negó a responder

↕

**13. Do you think COVID-19 has impacted your child's asthma care?**

**Cree que COVID-19 ha impactado el cuidado del asma de su hijo/a?**

- Yes  
Sí
- No  
No
- Don't Know  
No sé
- Refused to answer  
Se negó a responder

↕

**[BRANCHING]: 13.1 If YES to question 13, ask the following:**

**How so?**

**En caso afirmativo a la pregunta 13, pregunte lo siguiente:**

**Cómo?**

Expand

**14. Before the pandemic, when you needed medical care for {your child's asthma} right away, how often did you get care as soon as you needed it?**

**Antes de la pandemia, cuando necesitaba atención médica para el asma de su hijo/a de inmediato, ¿con qué frecuencia recibió atención tan pronto como la necesitó?**

- Never  
Nunca
- Sometimes  
A veces
- Usually  
Por lo general
- Always  
Always
- Don't Know  
No sé
- Refused to Answer  
Se negó a responder

↕

**15. Since the COVID-19 pandemic started, how has medical care for {your child's} asthma been impacted?**

- Couldn't get through to healthcare provider on the telephone



**I will read you a list of options and let me know if you agree with any of the following statements. You can pick more than one option.**

**[Note to interviewer: mark all that apply]**

**Desde que comenzó la pandemia COVID-19, ¿cómo se ha visto afectada la atención médica para el asma de su hijo/a?**

**Le leeré una lista de opciones y me avisa si está de acuerdo con cualquiera de las siguientes declaraciones. Puede elegir más de una opción.**

**[Nota para el entrevistador: marque todo lo que corresponda]**

- No pudo comunicarse por teléfono con el proveedor de atención médica
- Couldn't get an appointment with healthcare provider  
No pudo conseguir una cita con el proveedor de atención médica
- The wait at the doctor's office was too long once you arrived  
La espera en el consultorio del médico fue demasiado larga una vez que llegó
- Concerned about catching COVID-19 at the clinic/doctor's office  
Preocupado por contagiarse de COVID-19 en el consultorio de la clínica/médico
- The clinic/doctor's office wasn't open at a time when you could get there  
El consultorio de la clínica/médico no estaba abierto en un momento en que pudiera llegar
- Didn't have transportation  
No tenía transporte
- Didn't want to take public transportation to go to the doctor  
No quería tomar el transporte público para ir al médico
- The cost of the appointment was too high  
El costo de la cita era demasiado alto
- My child's asthma care was not affected  
La atención del asma de mi hijo/a no se vio afectada
- Are there other things we didn't mention that you would like to share? (specify)  
Hay otras cosas que no mencionamos que te gustaría compartir? (especificar):
- Refused to answer  
Se negó a responder

**16. Have you been able to get {your child's} asthma prescription medicines and medical supplies since the start of the pandemic?**

**Ha podido obtener medicamentos recetados para el asma y suministros médicos de su hijo/a desde el inicio de la pandemia?**

- Yes  
Sí
- No  
No
- Don't Know/Not Sure  
No sé/No estoy seguro
- Refused to answer  
Se negó a responder

5

**17. A spacer is a small attachment for an inhaler that makes it easier to use. Does {he/she/they} use a spacer with {his/her/their} asthma medications?**

- Yes
- No
- Medication is a dry powder inhaler or

|                                                                                                                                                                                                                                                                                                                                                                                                                                                                                                                                                      |                                                                                                                                                                                                                         |
|------------------------------------------------------------------------------------------------------------------------------------------------------------------------------------------------------------------------------------------------------------------------------------------------------------------------------------------------------------------------------------------------------------------------------------------------------------------------------------------------------------------------------------------------------|-------------------------------------------------------------------------------------------------------------------------------------------------------------------------------------------------------------------------|
| <p><b>Un espaciador es un pequeño accesorio para un inhalador que hace que sea más fácil de usar. ¿Usa un espaciador con los medicamentos para el asma?</b></p>                                                                                                                                                                                                                                                                                                                                                                                      | <p>disk inhaler not a canister inhaler</p> <p><input type="radio"/> (Medication has a built-in spacer/does not need a spacer</p> <p><input type="radio"/> Don't know</p> <p><input type="radio"/> Refused to answer</p> |
| <p><b>18. Since the COVID-19 pandemic started, did any of {child with asthma}'s health care providers offer Telehealth visits?</b></p> <p><b>[Interviewer note if needed: Telehealth refers to medical visits done over the telephone or video]</b></p> <p><b>Desde que comenzó la pandemia COVID-19, ¿alguno de los proveedores de atención médica de su "niño/a con asma" ofreció visitas de telesalud?</b></p> <p><b>[Nota del entrevistador si es necesario: telesalud se refiere a las visitas médicas realizadas por teléfono o video]</b></p> | <p><input type="radio"/> Yes<br/>Sí</p> <p><input type="radio"/> No<br/>No</p> <p><input type="radio"/> Don't Know<br/>No sé</p> <p><input type="radio"/> Refused to answer<br/>Se negó a responder</p>                 |
| <p><b>How many Telehealth appointments for {child}'s asthma did you have during this time period?</b></p> <p><b>Cuántas citas de telesalud para el asma de su niño/a tuvieron durante este período de tiempo</b></p>                                                                                                                                                                                                                                                                                                                                 | <input type="text"/>                                                                                                                                                                                                    |
| <p><b>SECTION C: COVID CARE FOR CHILD, HOUSEHOLD AND SOCIAL CIRCLE</b></p>                                                                                                                                                                                                                                                                                                                                                                                                                                                                           |                                                                                                                                                                                                                         |
| <p><b>Thank you for answering questions about your child's asthma. Now we are going to ask questions about {your child with asthma} and your family's health during the COVID-19 pandemic.</b></p>                                                                                                                                                                                                                                                                                                                                                   |                                                                                                                                                                                                                         |
| <p><b>Questions about child:</b></p>                                                                                                                                                                                                                                                                                                                                                                                                                                                                                                                 |                                                                                                                                                                                                                         |
| <p><b>SECCIÓN C: CUIDADO COVID PARA EL HIJO/A, EL HOGAR Y EL CÍRCULO SOCIAL</b></p>                                                                                                                                                                                                                                                                                                                                                                                                                                                                  |                                                                                                                                                                                                                         |
| <p><b>Gracias por responder preguntas sobre el asma de su hijo/a. Ahora vamos a hacer preguntas sobre su hijo/a con asma y la salud de su familia durante la pandemia COVID-19.</b></p>                                                                                                                                                                                                                                                                                                                                                              |                                                                                                                                                                                                                         |
| <p><b>Preguntas sobre el niño/a:</b></p>                                                                                                                                                                                                                                                                                                                                                                                                                                                                                                             |                                                                                                                                                                                                                         |
| <p><b>19. Since COVID-19 came to New York City (around March), has {your child with asthma} had fever, chills, cough, shortness of breath, muscle aches, diarrhea, or loss of smell or taste?</b></p> <p><b>Desde que COVID-19 llegó a la ciudad de Nueva York (alrededor de marzo), ¿ha tenido su hijo/a con asma fiebre, escalofríos, tos, dificultad para respirar, dolores musculares, diarrea o pérdida de olor o sabor?</b></p>                                                                                                                | <p><input type="radio"/> Yes<br/>Sí</p> <p><input type="radio"/> No<br/>No</p> <p><input type="radio"/> Don't Know<br/>No sé</p> <p><input type="radio"/> Refused to answer<br/>Se negó a responder</p>                 |
| <p><b>20. Have you tried to get medical care or advice from</b></p>                                                                                                                                                                                                                                                                                                                                                                                                                                                                                  |                                                                                                                                                                                                                         |

a doctor or nurse about COVID-19 for {your child with asthma} since the start of the pandemic?

Ha tratado de obtener atención médica o consejo de un médico o enfermera sobre COVID-19 para su hijo/a con asma desde el inicio de la pandemia?

- Yes  
Sí
- No  
No
- Don't Know  
No sé
- Refused to answer  
Se negó a responder

5

21. Has {your child with asthma} been tested for COVID-19? The test is a special nose or throat swab, a saliva test or a blood antibody test.

Le han hecho la prueba de Covid19 a su niño/a? La prueba es tomar una pequeña muestra de la nariz o garganta, o de saliva o una prueba de anticuerpos en sangre.

- Yes  
Si
- Nose or throat swab was done (if yes proceed to 21.2)  
Nariz o garganta (responde Si, pase a 21.2)
- Saliva test was done (if yes proceed to 21.3)  
Prueba en saliva(responde Si; pase a 21.3)
- Blood antibody test was done (if yes proceed to 21.4)  
Anticuerpos en sangre ( responde Si; pase a 21.4)
- No (if no proceed to 21.1)  
No (responde No; continua 21.1)
- Don't know  
No sabe
- Refused to answer  
Se negó a responder

#### Questions about household:

We are now going to ask questions about your household during the pandemic. Your household refers to the home you and {child with asthma} stayed in most nights from March 2020-August 2020.

#### Preguntas sobre el hogar:

Ahora vamos a hacer preguntas sobre su hogar durante la pandemia. Su hogar se refiere al hogar en el que usted y {niño/a con asma} se quedaron la mayoría de las noches desde marzo del 2020 hasta agosto del 2020.

22. How many people, children and adults including you, stayed in that home most nights? (Note you can also include 'refused to answer')

¿Cuántas personas, niños y adultos, incluyendo a usted, se quedaron en esa casa la mayoría de las noches? \_\_\_\_\_ [menú desplegable, 2-20, se negó a responder]

23 Since COVID-19 came to New York City (around March), has anyone in your household, (not including {your child with asthma}) had fever, chills, cough, shortness of breath, muscle aches, diarrhea, or loss of

- Yes  
Sí
- No

|                                                                                                                                                                                                                                                                                                                                                                                                                                             |                                                                                                                                                                                                                                                                                                                                                                                                                                                                                                                                                                                                                                                                                                                     |
|---------------------------------------------------------------------------------------------------------------------------------------------------------------------------------------------------------------------------------------------------------------------------------------------------------------------------------------------------------------------------------------------------------------------------------------------|---------------------------------------------------------------------------------------------------------------------------------------------------------------------------------------------------------------------------------------------------------------------------------------------------------------------------------------------------------------------------------------------------------------------------------------------------------------------------------------------------------------------------------------------------------------------------------------------------------------------------------------------------------------------------------------------------------------------|
| <p><b>smell or taste?</b></p> <p><b>Desde que el COVID-19 llegó a la ciudad de Nueva York (alrededor de marzo), ¿alguien en su hogar (sin incluir {su hijo/a con asma}) ha tenido fiebre, escalofríos, tos, dificultad para respirar, dolores musculares, diarrea o pérdida de olor o sabor?</b></p>                                                                                                                                        | <p>No</p> <p><input type="radio"/> Refused to answer<br/>Se negó a responder</p>                                                                                                                                                                                                                                                                                                                                                                                                                                                                                                                                                                                                                                    |
| <p><b>24. Do you think anyone in your household has or had COVID-19 (not including {your child with asthma})?</b></p> <p><b>Cree que alguien en su hogar tiene o ha tenido COVID-19 (sin incluir {su hijo/a con asma})?</b></p>                                                                                                                                                                                                             | <p><input type="radio"/> if yes, how many people in your household?<br/>Sí, en caso afirmativo, ¿cuántas personas en su hogar?</p> <p><input type="radio"/> No/Not sure<br/>No / No estoy seguro</p> <p><input type="radio"/> Don't answer<br/>No respuesta</p> <p><input type="radio"/> Refused to answer<br/>Se negó a responder</p>                                                                                                                                                                                                                                                                                                                                                                              |
| <p><b>[BRANCHING] 24.1 If YES:</b></p> <p><b>How many?</b></p> <p><b>En caso afirmativo:</b></p> <p><b>¿Cuántos?</b></p>                                                                                                                                                                                                                                                                                                                    | <input type="text"/>                                                                                                                                                                                                                                                                                                                                                                                                                                                                                                                                                                                                                                                                                                |
| <p><b>25. Have you tried to get medical care or advice for anyone in your household from a doctor or nurse about COVID-19 since the start of the pandemic?</b></p> <p><b>Ha tratado de obtener atención médica o consejos para alguien en su hogar de un médico o enfermero sobre el COVID-19 desde el comienzo de la pandemia?</b></p>                                                                                                     | <p><input type="radio"/> Yes<br/>Sí</p> <p><input type="radio"/> No<br/>No</p> <p><input type="radio"/> Refused to answer<br/>Se negó a responder</p>                                                                                                                                                                                                                                                                                                                                                                                                                                                                                                                                                               |
| <p><b>26. Has anyone in your household been tested for COVID-19 (excluding {your child with asthma})? The test is a special nose or throat swab, saliva test or a blood antibody test.</b></p> <p><b>(excluyendo su hijo/a con asma)¿Alguien en su hogar se ha hecho la prueba de COVID-19?</b></p> <p><b>La prueba consiste en un hisopo especial de nariz o garganta, una prueba de saliva o una prueba de anticuerpos en sangre.</b></p> | <p><input type="checkbox"/> Nose or throat swab was done: how many____ (if yes proceed to 27.2)<br/>Sí, en caso afirmativo, ¿cuántas personas se hicieron la prueba</p> <p><input type="checkbox"/> Saliva test was done: how many____ (if yes proceed to 27.3)<br/>Se hizo un frotis de la nariz o la garganta: cuántos ____ (en caso afirmativo, proceda a 27.2)</p> <p><input type="checkbox"/> Blood antibody test was done: how many____ (if yes proceed to 27.4)<br/>Se realizó una prueba de saliva: cuántos ____ (si es así, proceda a 27.3)</p> <p><input type="checkbox"/> No (if no proceed to 27.1)<br/>Se realizó una prueba de anticuerpos en sangre: cuántos ____ (en caso afirmativo, proceda a</p> |

|                                                                                                                                                                                                                                                                           |                                                                                                                                     |
|---------------------------------------------------------------------------------------------------------------------------------------------------------------------------------------------------------------------------------------------------------------------------|-------------------------------------------------------------------------------------------------------------------------------------|
|                                                                                                                                                                                                                                                                           | <input type="checkbox"/> Don't know<br>No se<br><input type="checkbox"/> Refused to answer<br>Se negó a responder                   |
| <p><b>28. Was anybody in your household hospitalized for COVID-19?</b></p> <p><b>Alguien de su hogar fue hospitalizado por COVID-19?</b></p>                                                                                                                              | <input type="radio"/> Yes<br>Sí<br><input type="radio"/> No<br>No<br><input type="radio"/> Refused to answer<br>Se negó a responder |
| <p><b>Questions about Social Circle:</b></p> <p><b>Do you have a relative or close friend (who you have not yet mentioned) who:</b></p> <p><b>Preguntas sobre su Círculo Social:</b></p> <p><b>¿Tiene un familiar o amigo cercano (que aún no ha mencionado) que:</b></p> |                                                                                                                                     |
| <p><b>29 29. Had symptoms of COVID-19?</b></p> <p><b>Ha tenido síntomas de COVID-19?</b></p>                                                                                                                                                                              | <input type="radio"/> Yes<br>Sí<br><input type="radio"/> No<br>No<br><input type="radio"/> Refused to answer<br>Se negó a responder |
| <p><b>30. Was diagnosed with COVID-19?</b></p> <p><b>Le diagnosticaron COVID-19?</b></p>                                                                                                                                                                                  | <input type="radio"/> Yes<br>Sí<br><input type="radio"/> No<br>No<br><input type="radio"/> Refused to answer<br>Se negó a responder |
| <p><b>31. Was hospitalized with COVID-19?</b></p> <p><b>Fue hospitalizado con COVID-19?</b></p>                                                                                                                                                                           | <input type="radio"/> Yes<br>Sí<br><input type="radio"/> No<br>No<br><input type="radio"/> Refused to answer<br>Se negó a responder |
| <p><b>32. Passed away/died from COVID-19?</b></p> <p><b>Falleció / murió de COVID-19?</b></p>                                                                                                                                                                             | <input type="radio"/> Yes<br>Sí<br><input type="radio"/> No<br>No                                                                   |

- Refused to answer  
Se negó a responder

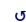

#### SECTION D: HOUSEHOLD CONDITIONS

**Thank you so much for sharing information about your family during this difficult time. Now we're going to ask some questions about your housing and living situation.**

#### Housing:

**Muchas gracias por compartir información sobre su familia durante este momento difícil. Ahora vamos a hacer algunas preguntas sobre su vivienda y su situación de vida.**

#### Alojamiento:

**33. Where did you sleep most nights from March - August 2020?**

**I will read you a list of options and let me know if you agree with any of the following statements.**

**Dónde durmió la mayoría de las noches de Marzo a Agosto del 2020?**

**Le leeré una lista de opciones y me avisara si está de acuerdo con alguna de las siguientes afirmaciones.**

- room, or apartment that you own  
Casa, habitación o apartamento que alquila
- [BRANCHING] 33.1- If yes, is it a New York City Housing Authority (or NYCHA) operated building? Yes/No/Not Sure/Refused to Answer  
Casa, habitación o apartamento que alquila En caso afirmativo, ¿es un edificio operado por la Autoridad de Vivienda de la Ciudad de Nueva York (o NYCHA)? Sí / No / No estoy seguro / Se negó a responder
- With a friend or relative  
Casa, habitación o apartamento de su propiedad
- In an emergency shelter, safe haven, or transitional housing  
En un refugio de emergencia, refugio seguro o vivienda de transición
- In an institution (jail, prison, long-term care facility, or nursing home)  
En una institución (cárcel, prisión, centro de cuidados a largo plazo o asilo de ancianos)
- Other (in a car, on the street)  
Otro (en un automóvil, en la calle)
- Refused to answer  
Se negó a responder

**34. How many bedrooms were there in that home?**

**Cuántos dormitorios había en esa casa?**

**35. Did you mostly stay in New York City during this**

time, or did you change homes?

Se quedó mayormente en la ciudad de Nueva York durante este tiempo o cambió de hogar?

- Stayed in New York City  
Me alojé en la ciudad de Nueva York
- Changed homes  
Cambio de casa
- Refused to answer  
Se negó a responder

↪

The next few questions are about the home where you were living most nights during the same time period, between March 2020 - August 2020:

Las siguientes preguntas son sobre el hogar donde vivió la mayoría de las noches durante el mismo período de tiempo, entre marzo del 2020 y agosto del 2020:

36. How did {the child with asthma} spend the majority of {his/her/their} day?

I will read you a list of options and let me know if you agree with any of the following statements. You can pick more than one option.

[Note to Interviewer: read option and check all that apply]

Cómo pasó {el niño/a con asma} la mayor parte de su día? Le leeré una lista de opciones y me avisa si está de acuerdo con alguna de las siguientes opciones. Puede elegir más de una opción.

[Nota para el entrevistador: lea la opción y marque todas las que correspondan]

- at home with a parent  
en casa con un padre
- at home with a caregiver (grandma, aunt, older sibling, etc)  
en casa con un cuidador (abuela, tía, hermano mayor, etc.)
- outside of the home at day care  
fuera de casa en la guardería
- outside of the home at a day summer camp  
fuera de casa en un campamento de verano
- outside of the home with a family friend/relative  
fuera de casa con un amigo / pariente de la familia
- inside of the home at a virtual/on-line school or day summer camp  
dentro de la casa en una escuela virtual / en línea o campamento de verano
- other: (please specify) \_\_\_\_  
otro: (especifique)
- Refused to answer  
Se negó a responder

37. Have you seen cockroaches inside your home?

Has visto cucarachas dentro de tu casa?

- Yes  
Sí
- No  
No
- Don't Know/Not Sure  
No sé/No estoy seguro
- Refused to answer  
Se negó a responder

↪

38. Have you seen evidence of mice or rats inside your home?

- Yes  
Sí

|                                                                                                                                                                    |                                                                                                                                                                                                         |                                                                                       |
|--------------------------------------------------------------------------------------------------------------------------------------------------------------------|---------------------------------------------------------------------------------------------------------------------------------------------------------------------------------------------------------|---------------------------------------------------------------------------------------|
| <p><b>Ha visto evidencia de ratones o ratas dentro de su casa?</b></p>                                                                                             | <p><input type="radio"/> No<br/>No</p> <p><input type="radio"/> Don't Know<br/>No sé</p> <p><input type="radio"/> Refused to answer<br/>Se negó a responder</p>                                         |    |
| <p><b>39. Have you seen or smelled mold/mildew in your home?</b></p> <p><b>Ha visto u olido moho / hongos en su casa?</b></p>                                      | <p><input type="radio"/> Yes<br/>Sí</p> <p><input type="radio"/> No<br/>No</p> <p><input type="radio"/> Don't Know<br/>No sé</p> <p><input type="radio"/> Refused to answer<br/>Se negó a responder</p> |    |
| <p><b>40. Is there evidence of water damage in your home?</b></p> <p><b>Hay evidencia de daños por agua en su hogar?</b></p>                                       | <p><input type="radio"/> Yes<br/>Sí</p> <p><input type="radio"/> No<br/>No</p> <p><input type="radio"/> Don't Know<br/>No sé</p> <p><input type="radio"/> Refused to answer<br/>Se negó a responder</p> |  |
| <p><b>41. Is there wall-to-wall carpet in your child's bedroom?</b></p> <p><b>Hay alfombra de pared a pared (piso completo) en el dormitorio de su hijo/a?</b></p> | <p><input type="radio"/> Yes<br/>Sí</p> <p><input type="radio"/> No<br/>No</p> <p><input type="radio"/> Don't Know<br/>No sé</p> <p><input type="radio"/> Refused to answer<br/>Se negó a responder</p> |  |
| <p><b>42. Do you have any furry pets?</b></p> <p><b>Tienes mascotas peludas? Ejemplos: perros, gatos</b></p>                                                       | <p><input type="radio"/> Yes<br/>Sí</p> <p><input type="radio"/> No<br/>No</p> <p><input type="radio"/> Don't Know<br/>No sé</p> <p><input type="radio"/> Refused to answer<br/>Se negó a responder</p> |  |
| <p><b>43. How often does anyone smoke inside your home?</b></p>                                                                                                    |                                                                                                                                                                                                         |                                                                                       |



**Con qué frecuencia fuma alguien dentro de su casa?**

- Daily  
Diariamente
- Weekly  
Semanal
- Monthly  
Mensual
- Less than monthly
- Never
- Don't know
- Refused to answer  
Se negó a responder

[↻](#)

**44.Are you worried about losing your housing?**

**Le preocupa perder su vivienda?**

- Yes [Note to Interviewer: If answers yes, provide information in follow up email regarding housing resources]
- No  
No
- Don't know  
No se
- Refused to Answer  
Se negó a responder

[↻](#)

#### SECTION E: SOCIAL DETERMINANTS OF HEALTH

Thank you so much for sharing this information with us. I am now going to ask about other things that may have affected your family during the pandemic

#### SECCIÓN E: DETERMINANTES SOCIALES DE LA SALUD

Muchas gracias por compartir esta información con nosotros. Ahora voy a preguntar sobre otras cosas que pudieron haber afectado a su familia durante la pandemia.

**45.During this same time period (between March 2020 - August 2020), how did you travel to do the things you need to do, such as going to work, appointments or shopping? (Please check all that apply)**

**I will read you a list of options and let me know if you agree with any of the following statements. You can pick more than one option.**

**Durante este mismo período de tiempo (entre marzo del 2020 y agosto del 2020), ¿cómo viajó para hacer las cosas que necesita hacer, como ir al trabajo, citas o compras? (Por favor marque todos los que apliquen)**

**Le leeré una lista de opciones y me avisara si está de acuerdo con alguna de las siguientes afirmaciones. Puede elegir más de una opción**

- Public transportation (Check all that apply: bus, subway, train {such as LIRR, Metro North, NJ Transit},or ferry)  
Transporte público (marque todo lo que corresponda: autobús, metro, tren {como LIRR, Metro-North, NJ Transit} o ferry)
- Walk  
Caminar
- Bike  
Bicicleta
- Own car  
Coche propio
- Rental car  
Coche de alquiler
- Taxi car  
Taxi

- Car service (like Uber or Lyft)  
Servicio de automóvil (como Uber o Lyft)
- I don't need to travel/I don't leave my home  
No necesito viajar / no salgo de mi casa
- Refused to answer  
Se negó a responder

**Food Insecurity/Access:**

**46. Since the pandemic started, how much did you worry that your food would run out before you got money to buy more?**

**Inseguridad alimentaria / acceso:**

**Desde que comenzó la pandemia, ¿cuánto le preocupaba que se le acabara la comida antes de tener dinero para comprar más?**

- Never  
Nunca
- Sometimes  
A veces
- Often  
A menudo
- Refused to answer  
Se negó a responder

**We are now going to ask questions about how you learned about COVID-19 and your understanding of how to stay healthy and your opinion about the response.**

**Ahora vamos a hacer preguntas sobre cómo se enteró del COVID-19 y su comprensión de cómo mantenerse saludable y su opinión sobre la respuesta.**

**47. What are the main ways you get information about the pandemic?**

**I will read you a list of options and let me know if you agree with any of the following statements. You can pick more than one option.**

**Cuáles son las principales formas de obtener información sobre la pandemia?**

**Le leeré una lista de opciones y me avisaré si está de acuerdo con cualquiera de las siguientes declaraciones. Puedes elegir más de una opción.**

**[Nota para el entrevistador - marque todos los que correspondan]**

- Government health websites (like the CDC or Department of Health)  
Pagina de salud del gobierno (como el CDC o el Departamento de Salud)
- Searching for information online (like Google)  
para obtener información por internet (como Google)
- Social media (like Facebook, Instagram, and Twitter)  
redes sociales (como Facebook, Instagram y Twitter)
- Television news or radio  
Noticias de televisión o radio
- Newspaper, magazines  
periódico, revistas
- Family/Friends  
Familia/Amigos
- Health care providers, like doctors  
Proveedores de Salud, como los doctores
- Community or faith leaders  
líderes de la comunidad o líderes de fe
- Other (please specify): \_  
Otro (por favor especifica):
- Refused to answer  
Se negó a responder

[Interviewer note - check all that apply]

**48. How often do you get information about the pandemic?**

**Con qué frecuencia obtiene información sobre la pandemia?**

- Less than once a month  
Menos de una vez al mes
- Several times a month  
Varias veces al mes
- Several times a week  
Varias veces a la semana
- Once a day  
Una vez al día
- 2-10 times a day  
2-10 veces al día
- More than 10 times a day  
Más de 10 veces al día
- Refused to answer  
Se negó a responder

3

**49. How informed would you say you are about the current pandemic?**

**Qué tan informado diría que usted está sobre la pandemia?**

- Not very informed  
No tan informado
- Somewhat informed  
Un poco informado
- Very informed  
Muy informado
- Refused to answer  
Se negó a responder

3

**50. I have or I will get the flu vaccine this year**

**Yo ya me puse o me voy a poner la vacuna del Flu este año ?**

**51. If a COVID-19 vaccine becomes available and is recommended for me, I would get it**

**Si la vacuna de Covid-19, llega a estar disponible y es recomendable para mi, me la pondre**

- Strongly Disagree  
Muy en desacuerdo
- Disagree  
Desacuerdo
- Neutral  
Neutral
- Agree  
De acuerdo
- Strongly Agree  
Muy de Acuerdo
- Don't Know  
No sé

3

**52. Does information about COVID-19 ever make you feel anxious/overwhelmed?**

- Yes - Often

|                                                                                                                                                                                                                                                                                                                                                                                                                                                                        |                                                                                                                                                                                                                                                                                                                                                                                                                                                                                                                                                                                                                                                                                                                                                                                                                                                                                                                                                                |
|------------------------------------------------------------------------------------------------------------------------------------------------------------------------------------------------------------------------------------------------------------------------------------------------------------------------------------------------------------------------------------------------------------------------------------------------------------------------|----------------------------------------------------------------------------------------------------------------------------------------------------------------------------------------------------------------------------------------------------------------------------------------------------------------------------------------------------------------------------------------------------------------------------------------------------------------------------------------------------------------------------------------------------------------------------------------------------------------------------------------------------------------------------------------------------------------------------------------------------------------------------------------------------------------------------------------------------------------------------------------------------------------------------------------------------------------|
| <p><b>La información sobre COVID-19 te hace sentir ansioso/abrumado?</b></p>                                                                                                                                                                                                                                                                                                                                                                                           | <p>Sí - A menudo<br/> <input type="radio"/> Yes - Sometimes<br/>                 Sí - A veces<br/> <input type="radio"/> No<br/>                 No<br/> <input type="radio"/> Refused to answer<br/>                 Se negó a responder</p>                                                                                                                                                                                                                                                                                                                                                                                                                                                                                                                                                                                                                                                                                                                  |
| <p><b>53. Can someone with COVID-19 infect others without feeling sick or without showing any symptoms?</b></p> <p><b>Puede alguien con COVID-19 infectar a otras personas sin sentirse enfermo o sin mostrar ningún síntoma?</b></p>                                                                                                                                                                                                                                  | <p><input type="radio"/> Yes<br/>                 Sí<br/> <input type="radio"/> No<br/>                 No<br/> <input type="radio"/> Refused to answer<br/>                 Se negó a responder</p>                                                                                                                                                                                                                                                                                                                                                                                                                                                                                                                                                                                                                                                                                                                                                           |
| <p><b>54. How does COVID-19 spread? (Select all that apply)</b></p> <p><b>I will read you a list of options and let me know if you agree with any of the following statements. You can pick more than one option.</b></p> <p><b>Cómo se propaga COVID-19? (Seleccione todos los que correspondan)</b></p> <p><b>Le leeré una lista de opciones y me avisara si está de acuerdo con cualquiera de las siguientes declaraciones. Puede elegir más de una opción.</b></p> | <p><input type="checkbox"/> When in close contact with an infected person (within about 6 feet).<br/>                 Cuando está en contacto cercano con una persona infectado (dentro de unos 6 pies).</p> <p><input type="checkbox"/> Through respiratory droplets produced when an infected person coughs or sneezes<br/>                 A través de gotas respiratorias producidas cuando una persona infectada tose o estornuda</p> <p><input type="checkbox"/> Touch a contaminated surface and then touching your eyes, nose or mouth.<br/>                 Toca una superficie contaminada y luego toque los ojos, la nariz o la boca.</p> <p><input type="checkbox"/> Though unprotected sex.<br/>                 A través el sexo sin protección.</p> <p><input type="checkbox"/> The virus is a hoax.<br/>                 El virus es un engaño.</p> <p><input type="checkbox"/> Refused to answer<br/>                 Se negó a responder</p> |
| <p><b>55.How likely do you think you are to get sick from COVID-19 in the next month?</b></p> <p><b>Score between 0 and 10 (drop down 0 not getting sick and 10 very likely getting sick, Refused to answer)</b></p> <p><b>Qué tan probable cree que usted se enfermará de COVID-19 en el próximo mes? Puntuación entre 0 y 10 (abajo 0 no enfermarse y 10 muy probable que se enferme, se negó a responder)</b></p>                                                   | <p></p>                                                                                                                                                                                                                                                                                                                                                                                                                                                                                                                                                                                                                                                                                                                                                                                                                                                                    |
| <p><b>56. Take 100 randomly selected people (not including you) who live in your zip code. How many, do you think, will get sick from COVID-19 in the next month?</b></p>                                                                                                                                                                                                                                                                                              | <p><input type="text"/></p>                                                                                                                                                                                                                                                                                                                                                                                                                                                                                                                                                                                                                                                                                                                                                                                                                                                                                                                                    |

\_\_\_\_ (drop down 0 not getting sick and 100 very likely getting sick, Refused to answer)

Tome 100 personas seleccionadas al azar (sin incluir a usted) que viven en su código postal. ¿Cuántos, crees, que se enfermarán de COVID-19 en el próximo mes? \_\_\_\_ (baja 0 no enfermarse y 100 muy probablemente enfermarse, Se negó a responder)

57. Take 100 randomly selected people (not including you) who live in your zip code. How many, do you think, have already gotten sick from COVID-19? \_\_\_\_ (drop down 0 not getting sick and 100 very likely getting sick, Refused to answer)

Tome 100 personas seleccionadas al azar (sin incluir a usted) que viven en su código postal. ¿Cuántos crees que ya se han enfermado de COVID-19? \_\_\_\_ (baja 0 no enfermarse y 100 muy probable que se enfermen, se negó a responder)

58. Do you feel that the government's policies help keep you safe from the virus?

Cree que las políticas del gobierno ayudan a mantenerle a salvo del virus?

Yes  
 Sí  
 No  
 No  
 Don't Know  
 No sé  
 Refused to answer  
 Se negó a responder

**Social Distancing/Higiene:**

59.0 The following statements ask about behaviors to stop the spread of COVID-19. For each statement, please indicate how often you do these activities. The choices are not at all, some of the time, much of the time or all of the time:

**Distanciamiento Social/Higiene Social:**

Las siguientes declaraciones preguntan acerca de los comportamientos para detener la propagación de COVID-19. Para cada declaración, indique la frecuencia con la que realiza estas actividades. Las opciones no son en absoluto, parte del tiempo, la mayor parte del tiempo o todo el tiempo:

|  | Not at all<br>no son en<br>absoluto | Some of the time<br>parte del tiempo | Most of the time<br>la mayor parte del<br>tiempo | All of the time<br>Todo el Tiempo |
|--|-------------------------------------|--------------------------------------|--------------------------------------------------|-----------------------------------|
|--|-------------------------------------|--------------------------------------|--------------------------------------------------|-----------------------------------|

|                                                                                                                                                                                   |                       |                       |                       |                       |
|-----------------------------------------------------------------------------------------------------------------------------------------------------------------------------------|-----------------------|-----------------------|-----------------------|-----------------------|
| 59.1 Use an alcohol-based hand sanitizer or wash your hands often with soap and water<br>Use desinfectante de base de alcohol o lavarse las manos con frecuencia con agua y jabón | <input type="radio"/> | <input type="radio"/> | <input type="radio"/> | <input type="radio"/> |
|-----------------------------------------------------------------------------------------------------------------------------------------------------------------------------------|-----------------------|-----------------------|-----------------------|-----------------------|

|  |                       |                       |                       |                       |
|--|-----------------------|-----------------------|-----------------------|-----------------------|
|  | <input type="radio"/> | <input type="radio"/> | <input type="radio"/> | <input type="radio"/> |
|--|-----------------------|-----------------------|-----------------------|-----------------------|

|                                                                                                                                                                                                                                                                                                         |                                                                                                                                                                                                                                                            |
|---------------------------------------------------------------------------------------------------------------------------------------------------------------------------------------------------------------------------------------------------------------------------------------------------------|------------------------------------------------------------------------------------------------------------------------------------------------------------------------------------------------------------------------------------------------------------|
| <p><b>59.2 Clean surfaces in your home like doorknobs, faucets, and counter tops</b><br/> <b>Limpie las superficies de su hogar</b><br/> <b>Como las chapas de la puerta, grifos y Encimeras</b></p>                                                                                                    |                                                                                                                                                                                                                                                            |
| <p><b>59.3. Wear a face mask or cover your face with a scarf, bandana, etc. when in public places</b><br/> <b>Use una máscara o cubierta facial como una bufanda, pañuelo, etc. cuando en lugares públicos</b></p>                                                                                      | <input type="radio"/> <input type="radio"/> <input type="radio"/> <input type="radio"/>                                                                                                                                                                    |
| <p><b>59.4 Stay at home, except to get food or medicine or go to work</b><br/> <b>Se queda en casa, excepto para comida o medicinas o ir a trabajar</b></p>                                                                                                                                             | <input type="radio"/> <input type="radio"/> <input type="radio"/> <input type="radio"/>                                                                                                                                                                    |
| <p><b>59.5 Reduce or avoid using healthcare facilities such as hospitals or clinics</b><br/> <b>Reducir o evitar el uso de lugares médica como hospitales o clínicas</b></p>                                                                                                                            | <input type="radio"/> <input type="radio"/> <input type="radio"/> <input type="radio"/>                                                                                                                                                                    |
| <p><b>59.6 Avoid public transportation</b><br/> <b>Evitar el transporte público</b></p>                                                                                                                                                                                                                 | <input type="radio"/> <input type="radio"/> <input type="radio"/> <input type="radio"/>                                                                                                                                                                    |
| <p><b>59.7 Avoid overly crowded places and gatherings of more than 10 people</b><br/> <b>Evitar el lugar lleno de gente y reuniones de más de 10 personas</b></p>                                                                                                                                       | <input type="radio"/> <input type="radio"/> <input type="radio"/> <input type="radio"/>                                                                                                                                                                    |
| <p><b>60. How difficult is it to engage in "social distancing" (keeping 6 feet away from people) when you are in public places?</b></p> <p><b>Qué tan difícil es participar en el "distanciamiento social" (mantenerse a 6 pies de distancia de las personas) cuando estás en lugares públicos?</b></p> | <input type="radio"/> Very difficult<br>Muy difícil<br><input type="radio"/> Difficult<br>Difícil<br><input type="radio"/> Easy<br>Fácil<br><input type="radio"/> Very easy<br>Muy Fácil<br><input type="radio"/> Refused to answer<br>Se negó a responder |
| <p><b>We're almost done! We just have a few more questions....</b></p>                                                                                                                                                                                                                                  |                                                                                                                                                                                                                                                            |
| <p><b>SECTION G: DEMOGRAPHICS and EMPLOYMENT</b></p>                                                                                                                                                                                                                                                    |                                                                                                                                                                                                                                                            |
| <p><b>Ya casi terminamos! Sólo tenemos algunas preguntas más....</b></p>                                                                                                                                                                                                                                |                                                                                                                                                                                                                                                            |
| <p><b>SECCIÓN G: DEMOGRAPHICS y EMPLEO</b></p>                                                                                                                                                                                                                                                          |                                                                                                                                                                                                                                                            |
| <p><b>61. What was the sex of {your child with asthma} at birth?</b></p> <p><b>Cuál fue el sexo de su hijo/a con asma al nacer?</b></p>                                                                                                                                                                 | <input type="radio"/> Male<br>Masculino<br><input type="radio"/> Female                                                                                                                                                                                    |

|                                                                                                                                                                                                                                               |                                                                                                                                                                                                                                                                                                                                                                                                                                                                                                                                                                                                                                                                            |
|-----------------------------------------------------------------------------------------------------------------------------------------------------------------------------------------------------------------------------------------------|----------------------------------------------------------------------------------------------------------------------------------------------------------------------------------------------------------------------------------------------------------------------------------------------------------------------------------------------------------------------------------------------------------------------------------------------------------------------------------------------------------------------------------------------------------------------------------------------------------------------------------------------------------------------------|
|                                                                                                                                                                                                                                               | <p>Mujer</p> <p><input type="radio"/> Intersex<br/>Intersexual</p> <p><input type="radio"/> Prefer not to say<br/>Prefiere no decir</p> <p><input type="radio"/> Refused to answer<br/>Se negó a responder</p>                                                                                                                                                                                                                                                                                                                                                                                                                                                             |
| <p><b>62. What is the race/ethnicity of {your child with asthma}? (Please check all that apply)</b></p> <p><b>Cuál es la raza/etnicidad de su hijo/a con asma? (Por favor marque todos los que correspondan) Hispano o Latino/Latinos</b></p> | <p><input type="checkbox"/> Hispanic or Latino/Latinos<br/>Hispano o Latino/Latinos</p> <p><input type="checkbox"/> Black or African American<br/>Negro o afroamericano</p> <p><input type="checkbox"/> White<br/>Blanco</p> <p><input type="checkbox"/> Asian<br/>Asiático</p> <p><input type="checkbox"/> Native Hawaiian or Pacific Islander<br/>Nativo hawaiano o isleño del Pacífico</p> <p><input type="checkbox"/> American Indian or Alaskan Native<br/>Indio americano o nativo de Alaska</p> <p><input type="checkbox"/> Other race (please specify):<br/>Otra raza (especificar):</p> <p><input type="checkbox"/> Refused to answer<br/>Se negó a responder</p> |
| <p><b>63. What is the highest level of school that you finished?</b></p> <p><b>Cuál es el nivel más alto de escuela que terminó?</b></p>                                                                                                      | <p><input type="radio"/> Did not attend school<br/>No asistió a la escuela</p> <p><input type="radio"/> Less than 8th grade<br/>Menos de grada 8</p> <p><input type="radio"/> Some high school degree<br/>Algunos títulos de bachillerato</p> <p><input type="radio"/> High school degree or GED<br/>Diploma de escuela Secundaria o GED</p> <p><input type="radio"/> Some college<br/>Ir a la universidad</p> <p><input type="radio"/> Bachelor's degree<br/>Licenciatura</p> <p><input type="radio"/> Post graduate degree<br/>Posgrado</p> <p><input type="radio"/> Refused to answer<br/>Se negó a responder</p>                                                       |
| <p><b>64. Has your job been affected by COVID-19 (Coronavirus) in any of the following ways?</b></p> <p><b>I will read you a list of options and let me know if you</b></p>                                                                   | <p><input type="checkbox"/> Moved to remote work<br/>Se ha trasladado al trabajo remoto</p> <p><input type="checkbox"/> Lost job permanently</p>                                                                                                                                                                                                                                                                                                                                                                                                                                                                                                                           |

agree with any of the following statements. You can pick more than one option.

Su trabajo ha sido afectado por COVID-19 (Coronavirus) de alguna de las siguientes maneras??

Le leeré una lista de opciones y me avisa si está de acuerdo con cualquiera de las siguientes declaraciones. Puede elegir más de una opción.

[Nota del entrevistador: marca todos lo que aplica]

- Trabajo perdido permanentemente
- Lost job temporarily
- Trabajo perdido temporalmente
- Hours have been reduced
- Horas se han reducido
- Hours have increased
- Horas han aumentado
- Job was designated as an essential service
- Su trabajo fue designado como un servicio esencial
- Your job puts you at increased risk of being infected by COVID-19 (Coronavirus)
- Su trabajo le pone en mayor riesgo de ser infectado por COVID-19 (Coronavirus)
- You had to lay off employees
- Tuvo que despedir a sus empleados
- None of these apply
- Ninguno de estos se aplica
- Job has not been affected by COVID-19
- Job no se ha visto afectado por COVID-19
- Refused to answer
- Se negó a responder

[Interviewer note - check all that apply]

[BRANCHING if participant works outside of home] 64.1 Does your job provide you with PPE (personal protective equipment)?

si el participante trabaja fuera de casa] 64.1 ¿Su trabajo le proporciona EPP (equipo de protección personal)?

- Yes
- Si
- No
- No
- I bring my own
- Not sure
- Refused to answer
- Se negó a responder

3

65. Has your spouse/partner's job been affected by COVID-19 (Coronavirus) in any of the following ways? (Mark all that apply)

I will read you a list of options and let me know if you agree with any of the following statements. You can pick more than one option.

El trabajo de su esposo o esposa/pareja se ha visto afectado por COVID-19(Corona virus) de alguna de las siguientes maneras? (Marque todo lo que corresponda)

Le leeré una lista de opciones y me avisa si está de acuerdo con cualquiera de las siguientes declaraciones. Puede elegir más de una opción.

- Not applicable - I do not have a spouse/partner
- No aplicable- No tengo esposo o esposa/pareja
- Your spouse/partner moved to remote work
- Su Esposo o Esposa/pareja se trasladó a un trabajo remoto
- Your spouse/partner lost his/her job permanently
- Su Esposo o Esposa/pareja perdió su trabajo de forma permanente
- Your spouse/partner lost his/her job temporarily
- Su Esposo o Esposa/pareja perdió su



**[Nota del entrevistador: marque todo lo que corresponda]**

- trabajo temporalmente
- Your spouse/partner had his/her hours reduced  
Su Esposo o Esposa/pareja le redujeron sus horas
- Your spouse/partner's hours have increased  
las horas de su Esposo o Esposa/pareja han aumentado
- Your spouse/partner's job was designated as an essential service  
el trabajo de su Esposo o Esposa/pareja fue designado como un servicio esencial
- Your spouse/partner's job puts him/her at increased risk of being infected by COVID-19 (Coronavirus)  
el trabajo de su Esposo o Esposa/pareja le pone en mayor riesgo de ser infectado por COVID-19 (Coronavirus)
- Your spouse/partner had to lay off employees  
Su Esposo o Esposa/pareja tuvo que despedir a sus empleados
- None of these apply  
Ninguno de estos se aplica
- Your spouse/partners job has not been affected by COVID-19  
Su trabajo de Esposo o Esposa/pareja no se ha visto afectado por COVID-19
- Don't know  
No se
- Refused to answer  
Se negó a responder

[Interviewer note - check all that apply]

**66. What was your household's total family income (before taxes) from all sources in the last year?**

**Cuál fue el ingreso familiar total de su hogar (antes de impuestos) de todas las fuentes en el último año?**

- Less than \$20,000 (or less than \$1,666 per month)  
Menos de \$20,000 (o menos de \$1,666 por mes)
- \$20,000 to \$39,999 (or \$1,666 to \$3,333 per month)  
de \$20,000 a \$39,999 (o \$1,666 a \$3,333 por mes)
- \$40,000 to \$59,999 (or \$3,333 to \$4,999 per month)  
de \$40,000 a \$59,999 (o \$3,333 a \$4,999 por mes)
- \$60,000 to \$79,999 (or \$5,000 to \$6,666 per month)  
de \$60,000 a \$79,999 (o \$5,000 a \$6,666 por mes)
- \$80,000 to \$99,999 (or \$6,666 to \$8,333 per month)

|                                                                                                                                                                                                                 |                                                                                                                                                                                                                                                                                                                                                                                                                                                                                                   |
|-----------------------------------------------------------------------------------------------------------------------------------------------------------------------------------------------------------------|---------------------------------------------------------------------------------------------------------------------------------------------------------------------------------------------------------------------------------------------------------------------------------------------------------------------------------------------------------------------------------------------------------------------------------------------------------------------------------------------------|
|                                                                                                                                                                                                                 | <p>per month)<br/>de \$80,000 a \$99,999 (o \$6,666 a \$8,333 por mes)</p> <p><input type="radio"/> \$100,000 to \$139,999 (or \$8,333 to \$11,666 per month)<br/>\$100,000 a \$139,999 (o \$8,333 a \$11,666 per mes)</p> <p><input type="radio"/> \$140,000 or more (or \$11,666 or more per month)<br/>\$140,000 o más (o \$11,666 o más por mes)</p> <p><input type="radio"/> Don't know<br/>No se</p> <p><input type="radio"/> Refused to answer<br/>Se negó a responder</p>                 |
| <p><b>67. Has your family income changed during the pandemic:</b></p> <p><b>Ha cambiado los ingresos de su familia durante la pandemia:</b></p>                                                                 | <p><input type="radio"/> Yes - we are earning more money<br/>Sí - estamos ganando más dinero</p> <p><input type="radio"/> Yes - we are earning less money<br/>Sí - estamos ganando menos dinero</p> <p><input type="radio"/> No - income has not changed<br/>No - los ingresos no han cambiado</p> <p><input type="radio"/> Refused to answer<br/>Se negó a responder</p>                                                                                                                         |
| <p><b>68. Insurance: What kind of health insurance does {your child with asthma} currently have?</b></p> <p><b>Seguro: ¿Qué tipo de seguro de salud tiene actualmente? su hijo/a con asma?</b></p>              | <p><input type="radio"/> No insurance/sliding scale<br/>Sin seguro</p> <p><input type="radio"/> Medicaid<br/>Medicaid</p> <p><input type="radio"/> Private health insurance<br/>Seguro médico privado</p> <p><input type="radio"/> Other insurance (please specify):<br/>Otro seguro (especificar):</p> <p><input type="radio"/> Don't know<br/>No se</p> <p><input type="radio"/> Cobra insurance<br/>Seguro de cobra</p> <p><input type="radio"/> Refused to answer<br/>Se negó a responder</p> |
| <p><b>69. Has {your child with asthma}'s medical insurance changed during the start of the pandemic?</b></p> <p><b>¿Ha cambiado el seguro médico de su hijo/a con asma durante el inicio de la pandemia</b></p> | <p><input type="radio"/> Yes<br/>Sí</p> <p><input type="radio"/> No<br/>No</p> <p><input type="radio"/> Don't Know<br/>No sé</p> <p><input type="radio"/> Refused to answer</p>                                                                                                                                                                                                                                                                                                                   |

Se negó a responder ↕

---

**[BRANCHING] 69.1 If Yes:**

**Did you lose the health insurance that covers {your child with asthma} since the pandemic started?**

**En caso afirmativo:**

**o ¿Perdió el seguro de salud que cubre a su hijo/a con asma desde que comenzó la pandemia?**

Yes

Sí

No

No

Don't Know

No sé

Refused to answer

Se negó a responder

↕

---

**70. [Comments] à "Comments: \_\_\_\_\_" or "Any other thoughts or experiences you want to share about the pandemic \_\_\_\_\_?"**

**70. [Comentarios] - "Comentarios: \_\_\_\_\_" o "Cualquier otro pensamiento o experiencia que desee compartir sobre la pandemia \_\_\_\_\_?"**

Expand

---

**Thank you for taking the time to help us learn about healthcare during COVID-19. We appreciate you sharing your experiences with us. We would like to offer you a \$40 gift card as an appreciation of your willingness to talk with us. Can I please have your email address to send the gift card? We will also be sending you information about resources that may be helpful to answer questions about asthma and environmental asthma triggers, as well as any resources that may be helpful to your family based on your survey responses.**

**Gracias por tomarse el tiempo para ayudarnos a aprender sobre la atención médica durante COVID-19. Agradecemos que comparta sus experiencias con nosotros. Nos gustaría ofrecerle una tarjeta de regalo de \$40 como una apreciación de su disposición a hablar con nosotros. ¿Puedo tener su dirección de correo electrónico para enviar la tarjeta de regalo? También le enviaremos información sobre recursos que pueden ser útiles para responder preguntas sobre el asma y los desencadenantes del asma ambiental, así como todos los recursos que pueden ser útiles para su familia en función de las respuestas de su encuesta.**

---

**How would you like to receive your gift card:**  
**By mail or coordinate a pickup at Mount Sinai, 17 east 102nd street or LSA, 333 East 110th st?**

Mail

Pick up Mount Sinai

Pick up LSA

↕

---

✔
